# Supplementary material for: Environmental Health Literacy as Knowing, Feeling, and Believing: Analyzing Linkages between Race, Ethnicity, and Socioeconomic Status and Willingness to Engage in Protective Behaviors against Health Threats
Source: MDPI journal article supplement (doi:10.3390/ijerph19052701), 2022-02-25
Supplement: s1 [file s1]

Table S1: Full regression model results for COVID-19 with both unstandardized and standardized coefficients

|                                                                                           | Model 1        |           | Model 2        |            | Model 3        |            | Model 4        |           |
|-------------------------------------------------------------------------------------------|----------------|-----------|----------------|------------|----------------|------------|----------------|-----------|
|                                                                                           | B (S.E.)       | $\beta$   | B (S.E.)       | $\beta$    | B (S.E.)       | $\beta$    | B (S.E.)       | $\beta$   |
| Intercept                                                                                 | 2.926 (0.181)  |           | 1.739 (.233)   |            | 1.677 (0.234)  |            | 0.615 (0.194)  |           |
| <b>Block 1: Demographics</b>                                                              |                |           |                |            |                |            |                |           |
| Coastal Counties                                                                          | -0.142 (0.086) | -0.061    | -0.135 (0.075) | -0.058     | -0.143 (0.075) | -0.061     | -0.081 (0.06)  | -0.035    |
| Age                                                                                       | 0.013 (0.002)  | 0.228 *** | 0.015 (0.002)  | 0.264 ***  | 0.015 (0.002)  | 0.258 ***  | 0.007 (0.002)  | 0.121 *** |
| Sex (female)                                                                              | 0.187 (0.08)   | 0.090 *   | 0.214 (0.071)  | 0.103 **   | 0.236 (0.071)  | 0.114 ***  | 0.140 (0.057)  | 0.068 *   |
| Education                                                                                 | 0.053 (0.027)  | 0.082 *   | 0.011 (0.024)  | 0.016      | 0.007 (0.024)  | 0.011      | 0.010 (0.019)  | 0.015     |
| Income                                                                                    | 0.023 (0.013)  | 0.076     | 0.017 (0.012)  | 0.058      | 0.013 (0.012)  | 0.044      | 0.009 (0.009)  | 0.029     |
| Rent home                                                                                 | 0.257 (0.092)  | 0.112 **  | 0.12 (0.081)   | 0.052      | 0.113 (0.081)  | 0.049      | 0.085 (0.064)  | 0.037     |
| Ethnicity (Hispanic)                                                                      | -0.049 (0.148) | -0.013    | -0.131 (0.13)  | -0.035     | -0.132 (0.129) | -0.035     | -0.059 (0.103) | -0.016    |
| Race (Black)                                                                              | 0.228 (0.108)  | 0.089 *   | 0.221 (0.096)  | 0.086 *    | 0.193 (0.096)  | 0.075 *    | 0.095 (0.077)  | 0.037     |
| Race (American Indian, Alaska Native, Asian, Native Hawaiian, Pacific Islander, or Other) | 0.049 (0.138)  | 0.015     | 0.069 (0.121)  | 0.021      | 0.019 (0.122)  | 0.006      | -0.026 (0.097) | -0.008    |
| Block R <sup>2</sup> (%)                                                                  |                | 7.307%    |                |            |                |            |                |           |
| <b>Block 2: Values and Beliefs</b>                                                        |                |           |                |            |                |            |                |           |
| Political ideology                                                                        |                |           | -0.126 (.034)  | -0.137 *** | -0.118 (0.034) | -0.128 *** | -0.053 (0.027) | -0.057    |
| Religiosity                                                                               |                |           | 0.033 (.026)   | 0.043      | 0.023 (0.026)  | 0.029      | -0.011 (0.021) | -0.015    |
| Trust in Research                                                                         |                |           | 0.483 (.038)   | 0.429 ***  | 0.460 (0.038)  | 0.409 ***  | 0.191 (0.033)  | 0.170 *** |
| Block R <sup>2</sup> (%)                                                                  |                |           |                | 22.139%    |                |            |                |           |
| <b>Block 3: Attention to News</b>                                                         |                |           |                |            |                |            |                |           |
| Science & health news                                                                     |                |           |                |            | 0.109 (.048)   | 0.132 *    | 0.062 (0.038)  | 0.075     |
| Politics & government news                                                                |                |           |                |            | -0.029 (.041)  | -0.040     | -0.045 (0.033) | -0.063    |
| Block R <sup>2</sup> (%)                                                                  |                |           |                |            |                | 0.895%     |                |           |
| <b>Block 4: Environmental Health Literacy</b>                                             |                |           |                |            |                |            |                |           |
| Factual knowledge                                                                         |                |           |                |            |                |            | 0.231 (0.049)  | 0.128 *** |
| Knowledge sufficiency                                                                     |                |           |                |            |                |            | 0.002 (0.001)  | 0.055 *   |
| Response efficacy                                                                         |                |           |                |            |                |            | 0.567 (0.029)  | 0.566 *** |

|                                            |                |
|--------------------------------------------|----------------|
| <i>Block R<sup>2</sup>(%)</i>              | 25.962%        |
| <b><i>Final Model R<sup>2</sup>(%)</i></b> | <b>56.303%</b> |
| N = 716                                    |                |

Table S2: Full regression model results for PFAS with both unstandardized and standardized coefficients

|                                                                                           | <b>Model 1</b> |           | <b>Model 2</b> |           | <b>Model 3</b> |           | <b>Model 4</b> |          |
|-------------------------------------------------------------------------------------------|----------------|-----------|----------------|-----------|----------------|-----------|----------------|----------|
|                                                                                           | B (S.E.)       | β         | B (S.E.)       | β         | B (S.E.)       | β         | B (S.E.)       | β        |
| Intercept                                                                                 | 3.347 (0.205)  |           | 2.486 (.288)   |           | 2.229 (0.287)  |           | 0.79 (0.264)   |          |
| <b><i>Block 1: Demographics</i></b>                                                       |                |           |                |           |                |           |                |          |
| Coastal Counties                                                                          | 0.175 (0.092)  | 0.070     | 0.225 (0.09)   | 0.090 *   | 0.249 (0.088)  | 0.099 **  | 0.101 (0.077)  | 0.040    |
| Age                                                                                       | -0.008 (0.003) | -0.129 ** | -0.008 (0.003) | -0.129 ** | -0.008 (0.003) | -0.130 ** | -0.002 (0.002) | -0.036   |
| Sex (female)                                                                              | 0.185 (0.084)  | 0.082 *   | 0.159 (0.082)  | 0.071     | 0.248 (0.082)  | 0.110 **  | 0.187 (0.071)  | 0.083 ** |
| Education                                                                                 | -0.003 (0.03)  | -0.004    | -0.021 (0.029) | -0.030    | -0.043 (0.029) | -0.061    | -0.043 (0.025) | -0.062   |
| Income                                                                                    | -0.013 (0.014) | -0.040    | -0.015 (0.014) | -0.049    | -0.018 (0.014) | -0.056    | -0.015 (0.012) | -0.048   |
| Rent home                                                                                 | 0.034 (0.098)  | 0.014     | -0.003 (0.097) | -0.001    | 0.01 (0.095)   | 0.004     | -0.008 (0.082) | -0.003   |
| Ethnicity (Hispanic)                                                                      | 0.187 (0.157)  | 0.047     | 0.134 (0.154)  | 0.033     | 0.102 (0.151)  | 0.025     | 0.183 (0.13)   | 0.045    |
| Race (Black)                                                                              | 0.407 (0.113)  | 0.145 *** | 0.395 (0.112)  | 0.141 *** | 0.34 (0.111)   | 0.122 **  | 0.169 (0.096)  | 0.060    |
| Race (American Indian, Alaska Native, Asian, Native Hawaiian, Pacific Islander, or Other) | -0.078 (0.146) | -0.021    | -0.006 (0.144) | -0.002    | 0.02 (0.141)   | 0.005     | 0.07 (0.122)   | 0.019    |
| <i>Block R<sup>2</sup> (%)</i>                                                            |                | 8.741%    |                |           |                |           |                |          |
| <b><i>Block 2: Values and Beliefs</i></b>                                                 |                |           |                |           |                |           |                |          |
| Political ideology                                                                        |                |           | -0.025 (0.04)  | -0.025    | -0.009 (0.039) | -0.009    | -0.021 (0.034) | -0.021   |
| Religiosity                                                                               |                |           | 0.064 (0.032)  | 0.075 *   | 0.055 (0.032)  | 0.065     | 0.038 (0.028)  | 0.045    |
| Trust in Research                                                                         |                |           | 0.257 (0.045)  | 0.210 *** | 0.188 (0.046)  | 0.154***  | 0.126 (0.04)   | 0.103 ** |
| <i>Block R<sup>2</sup> (%)</i>                                                            |                |           |                | 4.874%    |                |           |                |          |
| <b><i>Block 3: News Use</i></b>                                                           |                |           |                |           |                |           |                |          |
| Science & health news                                                                     |                |           |                |           | 0.117 (.058)   | 0.129 *   | 0.03 (0.051)   | 0.033    |
| Politics & government news                                                                |                |           |                |           | 0.072 (.051)   | 0.089     | 0.08 (0.044)   | 0.099    |

|                                                      |                   |           |
|------------------------------------------------------|-------------------|-----------|
| <i>Block R<sup>2</sup> (%)</i>                       | 3.598%            |           |
| <b><i>Block 4: Environmental Health Literacy</i></b> |                   |           |
| Specific factual knowledge                           | 0.117 (0.048)     | 0.075 *   |
| Knowledge sufficiency                                | -0.002<br>(0.001) | -0.048    |
| Response efficacy                                    | 0.588 (0.038)     | 0.503 *** |
| <i>Block R<sup>2</sup> (%)</i>                       | 21.646%           |           |
| <b><i>Final Model R<sup>2</sup> (%)</i></b>          | <b>38.859%</b>    |           |
| N = 716                                              |                   |           |
